# Supplementary material for: TRIB1 constitutes a molecular link between regulation of sleep and lipid metabolism in humans
Source: PubMed Central journal article supplement — Transl Psychiatry. 2012 Mar 20;2(3):e97–. doi: 10.1038/tp.2012.20 (PMC3316154; doi:10.1038/tp.2012.20), 2012-03-20
Supplement: tp201220x1.pdf [file tp201220x1.pdf]

| CHR | SNP        | BP        | A1 | BETA    | P TST    | BETA    | P TST, TC covariated | BETA    | P TST, HDL covariated | BETA    | P TST, LDL covariated | BETA    | P TST, TG covariated | BETA     | TC       | BETA     | P TC, TST cov | BETA     | P HDL-C  | BETA     | P HDL-C, TST cov | BETA     | P LDL    | BETA     | P LDL-C, TST cov | BETA     | P TG     | BETA     | P TG, TST cov | Trait   | Signal                                                                                                                           |
|-----|------------|-----------|----|---------|----------|---------|----------------------|---------|-----------------------|---------|-----------------------|---------|----------------------|----------|----------|----------|---------------|----------|----------|----------|------------------|----------|----------|----------|------------------|----------|----------|----------|---------------|---------|----------------------------------------------------------------------------------------------------------------------------------|
| 1   | rs873308   | 25631242  | G  | 0.0169  | 0.4175   | 0.0159  | 0.4435               | 0.0166  | 0.4229                | 0.0157  | 0.4510                | 0.0169  | 0.4174               | -0.4553  | 0.04978  | -0.5342  | 0.02838       | -0.01772 | 0.3384   | -0.00316 | 0.8705           | -0.2375  | 0.1033   | -0.269   | 0.0792           | 0.03954  | 0.7687   | -0.00309 | 0.9828        | TC      | transmembrane protein 57 ( <i>TMEM57</i> )                                                                                       |
| 1   | rs10903129 | 25641524  | A  | 0.0157  | 0.4513   | 0.0148  | 0.4790               | 0.0155  | 0.4579                | 0.0145  | 0.4859                | 0.0157  | 0.4506               | -0.4583  | 0.0484   | -0.5227  | 0.03167       | -0.01696 | 0.3619   | -0.00387 | 0.8423           | -0.2329  | 0.1101   | -0.2588  | 0.09042          | 0.02343  | 0.8591   | -0.00914 | 0.9479        | TC      | transmembrane protein 57 ( <i>TMEM57</i> )                                                                                       |
| 1   | rs11206510 | 55268627  | C  | 0.0244  | 0.3814   | 0.0219  | 0.4331               | 0.0276  | 0.3226                | 0.0206  | 0.4617                | 0.0256  | 0.3599               | -1.765   | 1.42E-08 | -1.783   | 4.84E-08      | 0.04935  | 0.0473   | 0.06029  | 0.02053          | -1.031   | 1.39E-07 | -1.052   | 3.06E-07         | -0.4142  | 0.02246  | -0.4039  | 0.03603       | LDL     | proprotein convertase subtilisin/kexin type 9 ( <i>PCSK9</i> )                                                                   |
| 1   | rs10889353 | 62890784  | C  | -0.0026 | 0.9132   | -0.0041 | 0.8611               | -0.0034 | 0.8855                | -0.0031 | 0.8943                | -0.0012 | 0.9603               | -0.8135  | 0.002016 | -0.9353  | 0.000698      | -0.00664 | 0.7523   | -0.01528 | 0.4872           | -0.1049  | 0.5269   | -0.1375  | 0.4285           | -0.4473  | 0.002872 | -0.471   | 0.002982      | TG      | dedicator of cytokinesis 7 ( <i>DOCK7</i> )                                                                                      |
| 1   | rs12740374 | 109619113 | T  | -0.0505 | 0.0480   | -0.0526 | 0.0393               | -0.0490 | 0.0546                | -0.0534 | 0.0365                | -0.0503 | 0.0485               | -1.127   | 7.30E-05 | -1.223   | 3.93E-05      | 0.03877  | 0.08764  | 0.02423  | 0.3079           | -0.6298  | 0.000423 | -0.6662  | 0.000375         | -0.05635 | 0.7319   | -0.02703 | 0.8768        | LDL     | soritin 1 ( <i>SORT1</i> )                                                                                                       |
| 1   | rs646776   | 109620053 | G  | -0.0474 | 0.0609   | -0.0496 | 0.0503               | -0.0460 | 0.0685                | -0.0504 | 0.0466                | -0.0473 | 0.0616               | -1.16    | 3.86E-05 | -1.226   | 2.93E-05      | 0.03878  | 0.08519  | 0.02361  | 0.3173           | -0.6668  | 0.00017  | -0.6851  | 0.000233         | -0.05473 | 0.7336   | -0.03908 | 0.8186        | TC, LDL | proline/serine-rich coiled-coil 1 ( <i>PSRC1</i> ), soritin 1 ( <i>SORT1</i> )                                                   |
| 1   | rs4846914  | 228362314 | G  | -0.0539 | 0.0103   | -0.0539 | 0.0103               | -0.0571 | 0.0066                | -0.0539 | 0.0102                | -0.0546 | 0.0094               | -1.1305  | 0.5785   | -0.00658 | 0.9787        | -0.05957 | 0.001505 | -0.06145 | 0.00171          | -0.08387 | 0.5701   | -0.02842 | 0.8542           | 0.2477   | 0.07072  | 0.2374   | 0.1019        | HDL, TG | UDP-N-acetyl-alpha-D-galactosamine:polypeptide N-acetylglucosaminyltransferase 2 (GalNAc-T2) ( <i>GALNT2</i> )                   |
| 2   | rs7557067  | 21061717  | G  | -0.0001 | 0.9963   | -0.0018 | 0.9384               | 0.0041  | 0.8588                | -0.0035 | 0.8805                | 0.0002  | 0.9937               | -1.136   | 1.19E-05 | -1.142   | 2.74E-05      | 0.07897  | 0.000141 | 0.08047  | 0.000213         | -0.907   | 2.57E-08 | -0.9098  | 1.05E-07         | 0.06587  | 0.6633   | 0.02808  | 0.8613        | TG      | apolipoprotein B (including Ag(x) antigen) ( <i>APOB</i> )                                                                       |
| 2   | rs515135   | 21139562  | A  | -0.0019 | 0.9427   | -0.0034 | 0.8951               | -0.0007 | 0.9794                | -0.0059 | 0.8213                | -0.0029 | 0.9117               | -1.046   | 0.000323 | -0.9105  | 0.002932      | 0.005712 | 0.806    | 0.02234  | 0.3602           | -0.9594  | 1.53E-07 | -0.9336  | 1.23E-06         | 0.3203   | 0.05339  | 0.3449   | 0.05031       | LDL     | apolipoprotein B (including Ag(x) antigen) ( <i>APOB</i> )                                                                       |
| 2   | rs562338   | 21141826  | T  | -0.0030 | 0.9094   | -0.0046 | 0.8605               | -0.0018 | 0.9465                | -0.0071 | 0.7886                | -0.0040 | 0.8787               | -1.049   | 0.000347 | -0.9063  | 0.003316      | 0.00619  | 0.7916   | 0.0223   | 0.3646           | -0.9487  | 2.69E-07 | -0.9192  | 2.21E-06         | 0.2953   | 0.07722  | 0.3375   | 0.05733       | LDL     | apolipoprotein B (including Ag(x) antigen) ( <i>APOB</i> )                                                                       |
| 2   | rs1260326  | 27584444  | T  | 0.0277  | 0.2083   | 0.0277  | 0.2081               | 0.0283  | 0.1967                | 0.0264  | 0.2294                | 0.0257  | 0.2426               | 0.06756  | 0.7813   | 0.01285  | 0.9599        | 0.00173  | 0.9255   | 0.01368  | 0.5045           | -0.2673  | 0.08048  | -0.2474  | 0.1239           | 0.6072   | 1.63E-05 | 0.5416   | 0.000302      | TG      | glucokinase (hexokinase 4) regulator ( <i>GCKR</i> )                                                                             |
| 2   | rs780094   | 27594741  | A  | 0.0268  | 0.2121   | 0.0267  | 0.2140               | 0.0275  | 0.2011                | 0.0258  | 0.2308                | 0.0253  | 0.2394               | 0.01396  | 0.9535   | -0.06334 | 0.8014        | 0.004551 | 0.8119   | 0.01275  | 0.5251           | -0.2591  | 0.08528  | -0.2413  | 0.1278           | 0.5678   | 4.40E-05 | 0.5001   | 0.000722      | TG      | glucokinase (hexokinase 4) regulator ( <i>GCKR</i> )                                                                             |
| 2   | rs6756629  | 43918594  | T  | -0.0507 | 0.1767   | -0.0536 | 0.1538               | -0.0515 | 0.1697                | -0.0534 | 0.1547                | -0.0490 | 0.1915               | -1.843   | 1.05E-05 | -1.627   | 0.000217      | -0.02242 | 0.5023   | -0.0169  | 0.6298           | -0.8368  | 0.001459 | -0.6466  | 0.01948          | -0.5039  | 0.0382   | -0.5845  | 0.02397       | TC      | ATP-binding cassette, sub-family G (WHITE), member 5 ( <i>ABCG5</i> )                                                            |
| 2   | rs6544713  | 43927385  | T  | 0.0284  | 0.2594   | 0.0299  | 0.2353               | 0.0268  | 0.2877                | 0.0305  | 0.2261                | 0.0279  | 0.2685               | 0.8466   | 0.002589 | 0.8349   | 0.004616      | -0.02119 | 0.3458   | -0.02952 | 0.2093           | 0.5035   | 0.004367 | 0.4759   | 0.01031          | 0.1406   | 0.3809   | 0.1746   | 0.3042        | LDL     | ATP-binding cassette, sub-family G (WHITE), member 5 ( <i>ABCG5</i> )                                                            |
| 5   | rs3846662  | 74686840  | G  | -0.0033 | 0.8733   | -0.0017 | 0.9357               | -0.0025 | 0.9057                | -0.0015 | 0.9428                | -0.0038 | 0.8547               | 1.066    | 3.92E-06 | 1.019    | 2.78E-05      | 0.01824  | 0.3222   | 0.01573  | 0.4163           | 0.4656   | 0.001337 | 0.4411   | 0.003924         | 0.1564   | 0.2424   | 0.1618   | 0.2566        | TC      | 3-hydroxy-3-methylglutaryl-CoA reductase ( <i>HMGCR</i> )                                                                        |
| 5   | rs3846663  | 74691482  | T  | 0.0064  | 0.7631   | 0.0079  | 0.7088               | 0.0073  | 0.7297                | 0.0077  | 0.7153                | 0.0057  | 0.7864               | 1.001    | 2.00E-05 | 0.9375   | 0.000145      | 0.02202  | 0.2425   | 0.01819  | 0.3572           | 0.351    | 0.01732  | 0.3242   | 0.03671          | 0.2392   | 0.08283  | 0.2311   | 0.1159        | LDL     | 3-hydroxy-3-methylglutaryl-CoA reductase ( <i>HMGCR</i> )                                                                        |
| 7   | rs12670798 | 21573877  | C  | -0.0582 | 0.0148   | -0.0579 | 0.0153               | -0.0584 | 0.0143                | -0.0582 | 0.0148                | -0.0594 | 0.0130               | 0.2546   | 0.342    | 0.2012   | 0.4719        | -0.00879 | 0.6821   | -0.00691 | 0.7566           | 0.01595  | 0.9245   | -0.01333 | 0.9396           | 0.423    | 0.006772 | 0.4037   | 0.01436       | LDL     | dynein, axonemal, heavy chain 11 ( <i>DNAH11</i> )                                                                               |
| 7   | rs2072183  | 44545705  | G  | 0.0144  | 0.4912   | 0.0125  | 0.5510               | 0.0178  | 0.3960                | 0.0121  | 0.5659                | 0.0148  | 0.4793               | -0.9198  | 8.49E-05 | -0.9628  | 8.58E-05      | 0.06373  | 0.000681 | 0.02287  | 0.001344         | -0.5771  | 9.12E-05 | -0.5858  | 0.000152         | -0.1676  | 0.2102   | -0.1554  | 0.272         | LDL     | NPC1 (Niemann-Pick disease, type C1, gene)-like 1 ( <i>NPC1L1</i> )                                                              |
| 7   | rs2073547  | 44548856  | C  | 0.0170  | 0.4490   | 0.0169  | 0.4526               | 0.0159  | 0.4798                | 0.0171  | 0.4475                | 0.0170  | 0.4484               | -0.1232  | 0.622    | -0.07014 | 0.7889        | -0.02187 | 0.5209   | -0.06204 | 0.331            | -0.05696 | 0.7176   | 0.02391  | 0.885            | 0.000612 | 0.9966   | -0.0086  | 0.9552        | LDL     | NPC1 (Niemann-Pick disease, type C1, gene)-like 1 ( <i>NPC1L1</i> )                                                              |
| 7   | rs714052   | 72502805  | C  | 0.0213  | 0.5029   | 0.0208  | 0.5114               | 0.0218  | 0.4923                | 0.0222  | 0.4849                | 0.0219  | 0.4905               | -0.2059  | 0.5578   | -0.2404  | 0.5168        | 0.007619 | 0.7871   | 0.01064  | 0.7203           | 0.2453   | 0.2673   | 0.2403   | 0.3036           | -0.2503  | 0.2121   | -0.2226  | 0.2979        | TG      | MLX interacting protein-like ( <i>MLXIP</i> )                                                                                    |
| 7   | rs17145738 | 72620810  | T  | 0.0288  | 0.3563   | 0.0285  | 0.3613               | 0.0294  | 0.3466                | 0.0298  | 0.3403                | 0.0296  | 0.3440               | -0.1007  | 0.7714   | -0.1579  | 0.6655        | 0.01053  | 0.7041   | 0.01162  | 0.6904           | 0.2559   | 0.2404   | 0.2264   | 0.3247           | -0.2569  | 0.1989   | -0.2203  | 0.3012        | TG      | B-cell CLL/lymphoma 7B ( <i>BCL7B</i> ), transducin (beta)-like 2 ( <i>TBL2</i> ), MLX interacting protein-like ( <i>MLXIP</i> ) |
| 8   | rs7819412  | 11082571  | A  | -0.0192 | 0.3639   | -0.0193 | 0.3603               | -0.0185 | 0.3806                | -0.0195 | 0.3565                | -0.0195 | 0.3569               | -0.06251 | 0.7912   | -0.08913 | 0.718         | 0.007988 | 0.6719   | 0.01148  | 0.5587           | -0.01194 | 0.9359   | -0.0734  | 0.6363           | 0.04088  | 0.7665   | 0.09685  | 0.5055        | TG      | XK, Kell blood group complex subunit-related family, member 6 ( <i>XKR6</i> )                                                    |
| 8   | rs11774572 | 11484209  | T  | -0.0076 | 0.7189   | -0.0073 | 0.7316               | -0.0061 | 0.7739                | -0.0075 | 0.7240                | -0.0080 | 0.7041               | 0.2338   | 0.3228   | 0.2319   | 0.3479        | 0.02234  | 0.2367   | 0.02894  | 0.1413           | 0.09276  | 0.532    | 0.03562  | 0.8185           | 0.1298   | 0.3504   | 0.1554   | 0.291         | TG      | XK, Kell blood group complex subunit-related family, member 6 ( <i>XKR6</i> )                                                    |
| 8   | rs17482753 | 19876926  | T  | 0.0333  | 0.3551   | 0.0346  | 0.3366               | 0.0428  | 0.2355                | 0.0365  | 0.3107                | 0.0358  | 0.3212               | 0.626    | 0.1197   | 0.7054   | 0.09411       | 0.1572   | 1.00E-06 | 0.1697   | 4.43E-07         | 0.6023   | 0.01721  | 0.7053   | 0.007776         | -0.6648  | 0.003779 | -0.793   | 0.001094      | HDL     | lipoprotein lipase ( <i>LPL</i> )                                                                                                |
| 8   | rs12678919 | 19888052  | G  | 0.0335  | 0.3579   | 0.0348  | 0.3401               | 0.0434  | 0.2346                | 0.0366  | 0.3160                | 0.0359  | 0.3248               | 0.6797   | 0.09547  | 0.7384   | 0.08387       | 0.1698   | 1.82E-07 | 0.1809   | 1.05E-07         | 0.605    | 0.01827  | 0.7051   | 0.008705         | -0.6556  | 0.004722 | -0.7928  | 0.001238      | HDL     | lipoprotein lipase ( <i>LPL</i> )                                                                                                |
| 8   | rs2083637  | 19904855  | G  | -0.0111 | 0.6405   | -0.0109 | 0.6460               | -0.0048 | 0.8397                | -0.0096 | 0.6836                | -0.0094 | 0.6909               | -0.00215 | 0.9935   | 0.1029   | 0.7109        | 0.1125   | 1.01E-07 | 0.1174   | 1.05E-07         | 0.1174   | 0.1643   | 0.3365   | 0.05406          | -0.5485  | 0.000361 | -0.5716  | 0.000459      | HDL     | lipoprotein lipase ( <i>LPL</i> )                                                                                                |
| 8   | rs17321515 | 126555591 | G  | 0.0815  | 8.92E-05 | 0.0799  | 1.24E-04             | 0.0836  | 5.77E-05              | 0.0800  | 1.19E-04              | 0.0821  | 7.82E-05             | -1.004   | 1.45E-05 | -0.9027  | 0.0002        | 0.04351  | 0.01889  | 0.04216  | 0.02986          | -0.3587  | 0.01387  | -0.3218  | 0.03524          | -0.2679  | 0.0389   | -0.221   | 0.1068        | TG      | tribbles homolog 1 ( <i>Drosophila</i> ) ( <i>TRIB1</i> )                                                                        |
| 8   | rs2954029  | 126560154 | T  | 0.0764  | 2.46E-04 | 0.0750  | 3.20E-04             | 0.0788  | 1.53E-04              | 0.0750  | 3.17E-04              | 0.0770  | 2.17E-04             | -0.95    | 4.62E-05 | -0.865   | 0.000401      | 0.05017  | 0.007092 | 0.04652  | 0.01706          | -0.3409  | 0.02008  | -0.3156  | 0.0401           | -0.2904  | 0.02919  | -0.219   | 0.1204        | TG      | tribbles homolog 1 ( <i>Drosophila</i> ) ( <i>TRIB1</i> )                                                                        |
| 9   | rs471364   | 15279578  | G  | -0.0580 | 0.1039   | -0.0594 | 0.0963               | -0.0624 | 0.0800                | -0.0589 | 0.0987                | -0.0577 | 0.1057               | -0.8719  | 0.02866  | -0.8815  | 0.03496       | -0.09493 | 0.002824 | -0.08478 | 0.01081          | -0.1678  | 0.5029   | -0.2254  | 0.3915           | -0.168   | 0.4691   | -0.09906 | 0.6878        | HDL     | tetratricopeptide repeat domain 398 ( <i>TTC398</i> )                                                                            |
| 9   | rs3890182  | 106687476 | A  | -0.0149 | 0.6540   | -0.0172 | 0.6058               | -0.0208 | 0.5330                | -0.0176 | 0.5972                | -0.0157 | 0.6371               | -1.397   | 0.000163 | -1.537   | 7.94E-05      | -0.1073  | 0.000286 | -0.1077  | 0.000512         | -0.6861  | 0.003221 | -0.7134  | 0.003592         | 0.2958   |          |          |               |         |                                                                                                                                  |
