# Supplementary material for: TRIB1 constitutes a molecular link between regulation of sleep and lipid metabolism in humans
Source: PubMed Central journal article supplement — Transl Psychiatry. 2012 Mar 20;2(3):e97–. doi: 10.1038/tp.2012.20 (PMC3316154; doi:10.1038/tp.2012.20), 2012-03-20
Supplement: tp201220x2.pdf [file tp201220x2.pdf]

**Supplemental table 2. Analysis of association with lipid traits in different sleep duration groups in healthy individuals**

| rs17321515 |             | P      |        |        |        | β       |         |         |         |
|------------|-------------|--------|--------|--------|--------|---------|---------|---------|---------|
| N          | TST         | TC     | HDL-C  | LDL-C  | TG     | TC      | HDL-C   | LDL-C   | TG      |
| 633        | ≤6          | 0.1189 | 0.0483 | 0.8801 | 0.0006 | -0.0924 | 0.0429  | -0.0095 | -0.1878 |
| 3380       | 7 to 8      | 0.0355 | 0.5815 | 0.0745 | 0.5068 | -0.0532 | 0.0049  | -0.0458 | -0.0143 |
| 544        | 9=<         | 0.9780 | 0.2029 | 0.6189 | 0.4146 | 0.0017  | -0.0282 | 0.0302  | 0.0521  |
| 4557       | Combined    | 0.0039 | 0.0364 | 0.0663 | 0.0046 | -0.0607 | 0.0156  | -0.0395 | -0.0532 |
|            | Interaction | 0.2250 | 0.0890 | 0.8210 | 0.0676 |         |         |         |         |

| rs2954029 |             | P      |        |        |        | β       |        |         |         |
|-----------|-------------|--------|--------|--------|--------|---------|--------|---------|---------|
| N         | TST         | TC     | HDL-C  | LDL-C  | TG     | TC      | HDL-C  | LDL-C   | TG      |
| 633       | ≤6          | 0.1175 | 0.0249 | 0.7204 | 0.0013 | -0.0937 | 0.0491 | -0.0231 | -0.1815 |
| 3380      | 7 to 8      | 0.0334 | 0.4309 | 0.0504 | 0.4847 | -0.0539 | 0.0071 | -0.0502 | -0.0151 |
| 544       | 9=<         | 0.8438 | 0.3601 | 0.6756 | 0.4492 | -0.0124 | 0.0205 | -0.0262 | -0.0499 |
| 4557      | Combined    | 0.0034 | 0.0184 | 0.0544 | 0.0031 | -0.0436 | 0.0177 | -0.0416 | -0.0561 |
|           | Interaction | 0.2220 | 0.0461 | 0.8961 | 0.0462 |         |        |         |         |
